# Supplementary material
Source: PubMed Central journal article supplement (PMC3652982)

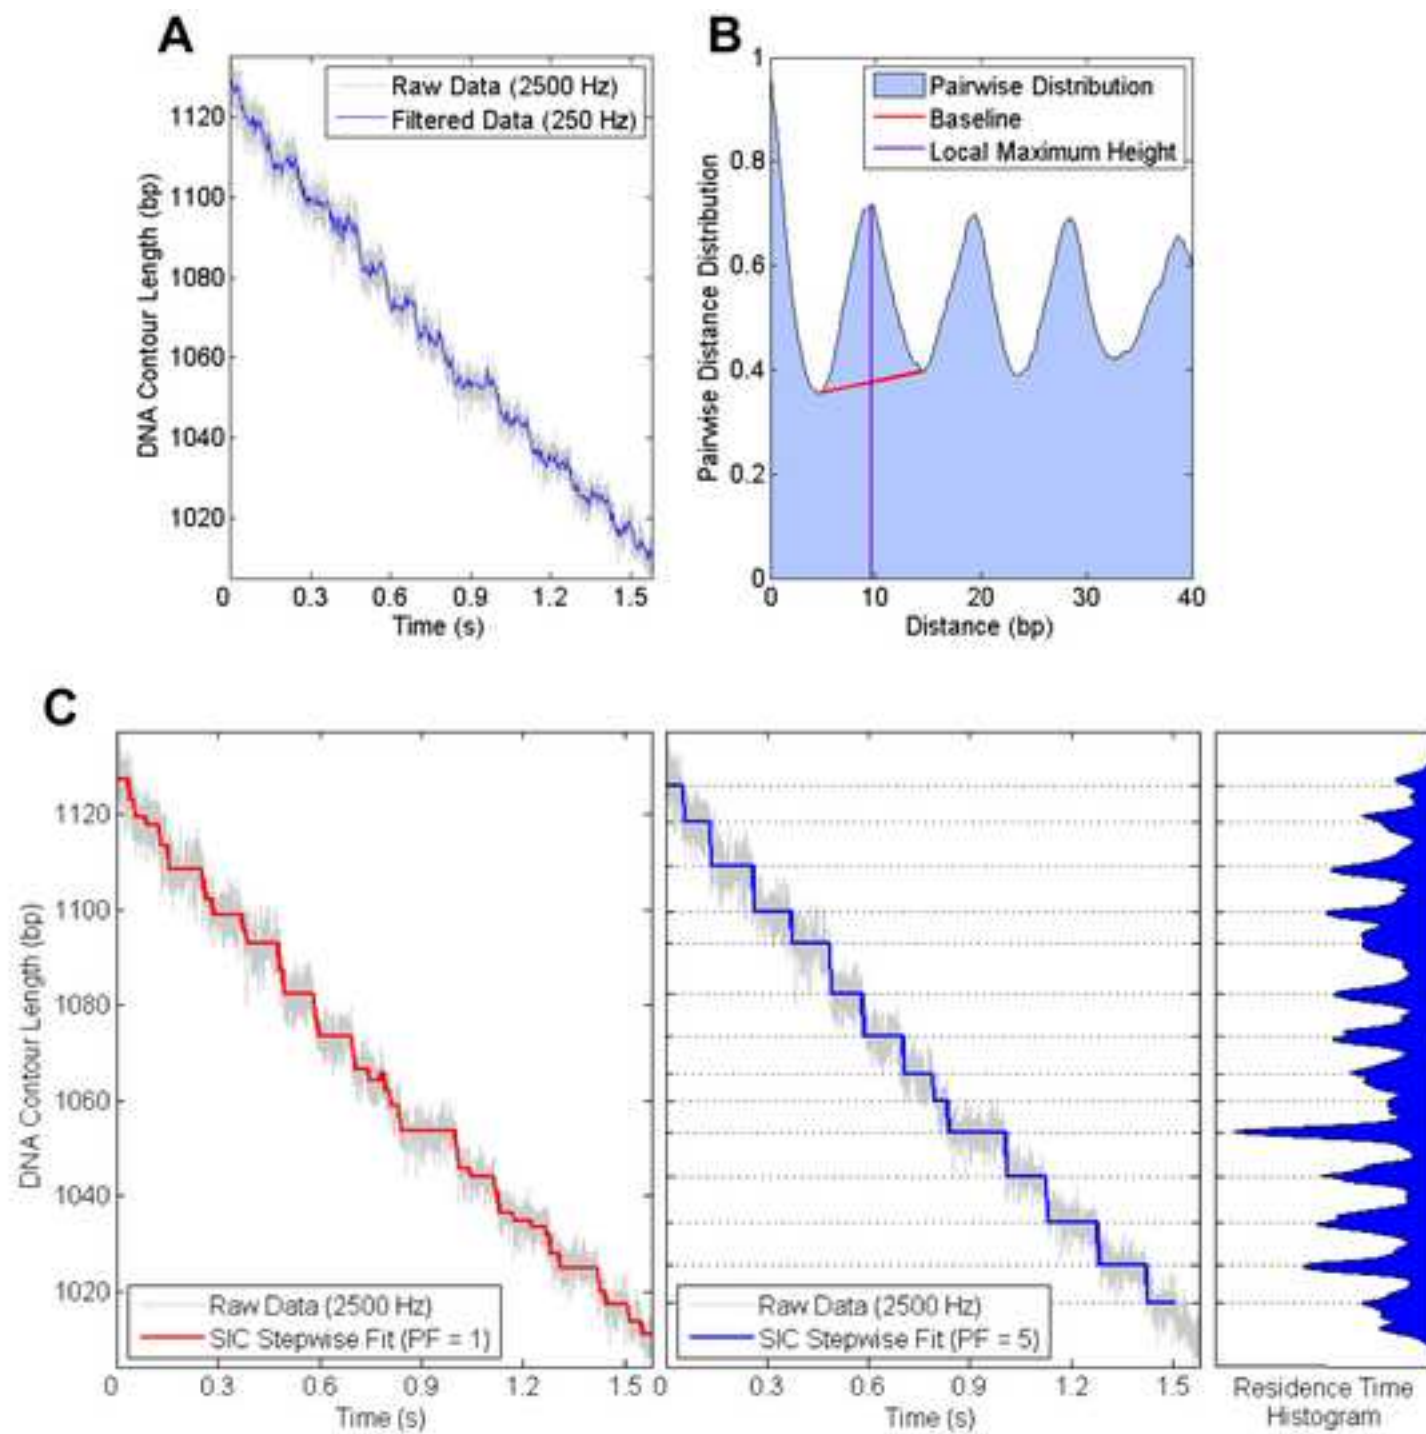

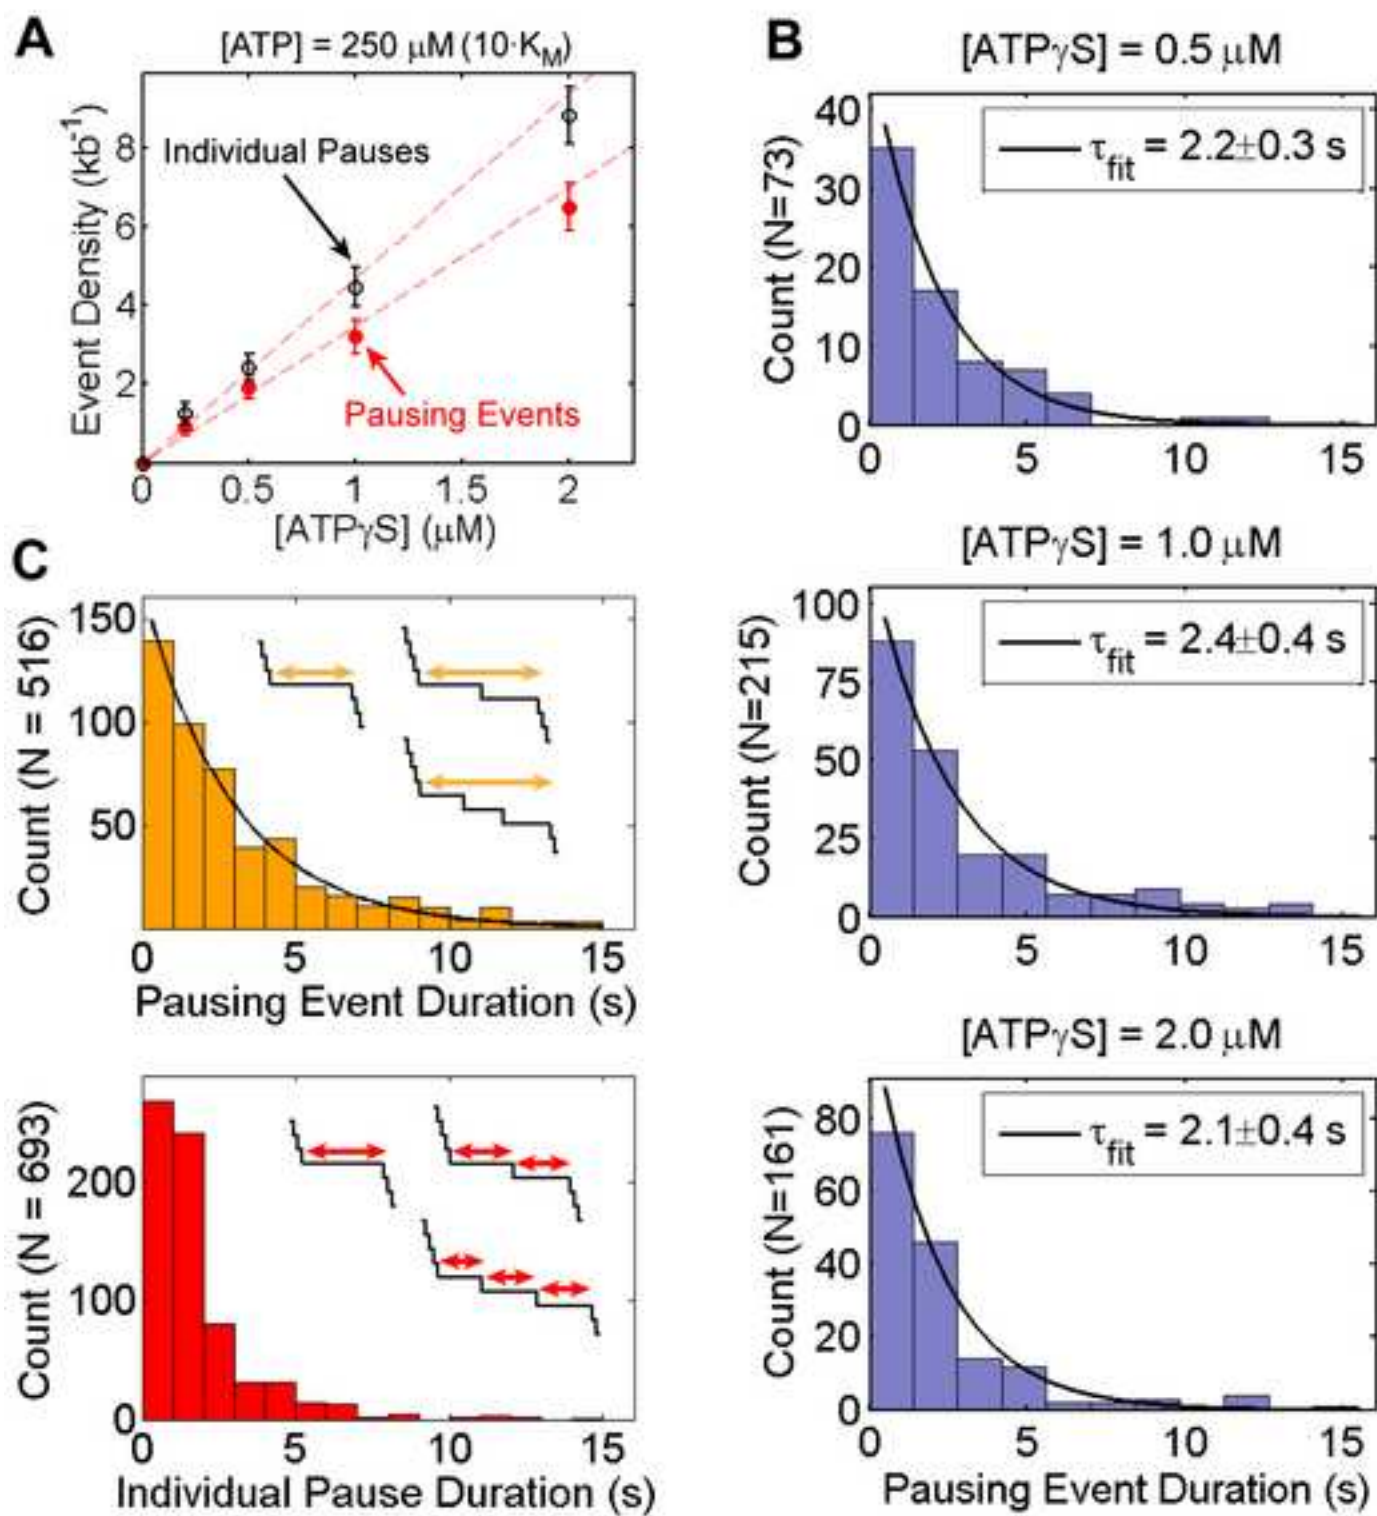



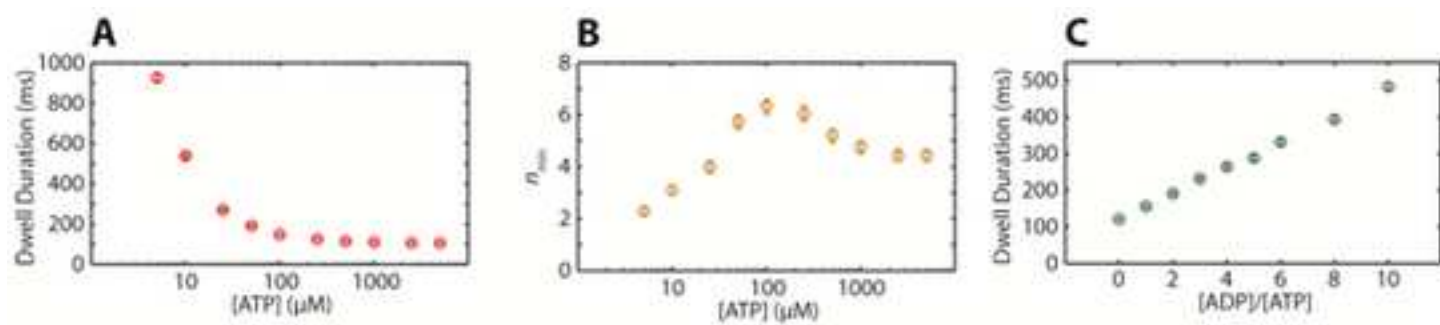Off-pathway ADP Inhibition  $D \rightarrow E \leftrightarrow T \rightarrow T^*$ 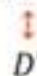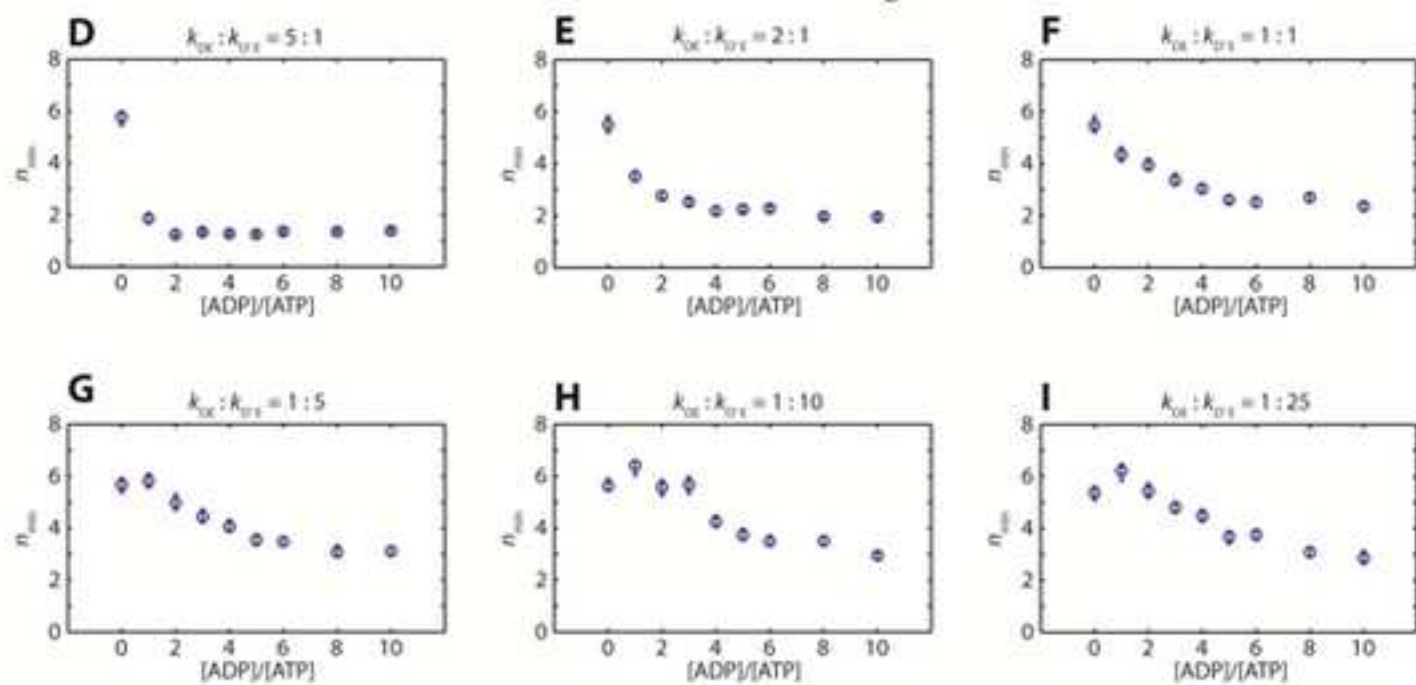On-pathway ADP Inhibition  $D \leftrightarrow E \leftrightarrow T \rightarrow T^*$ 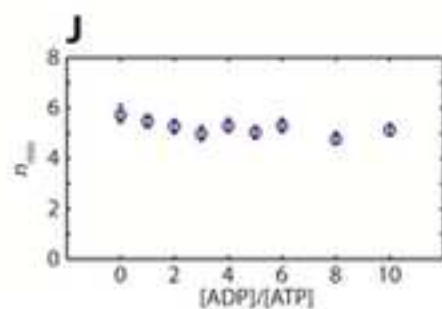

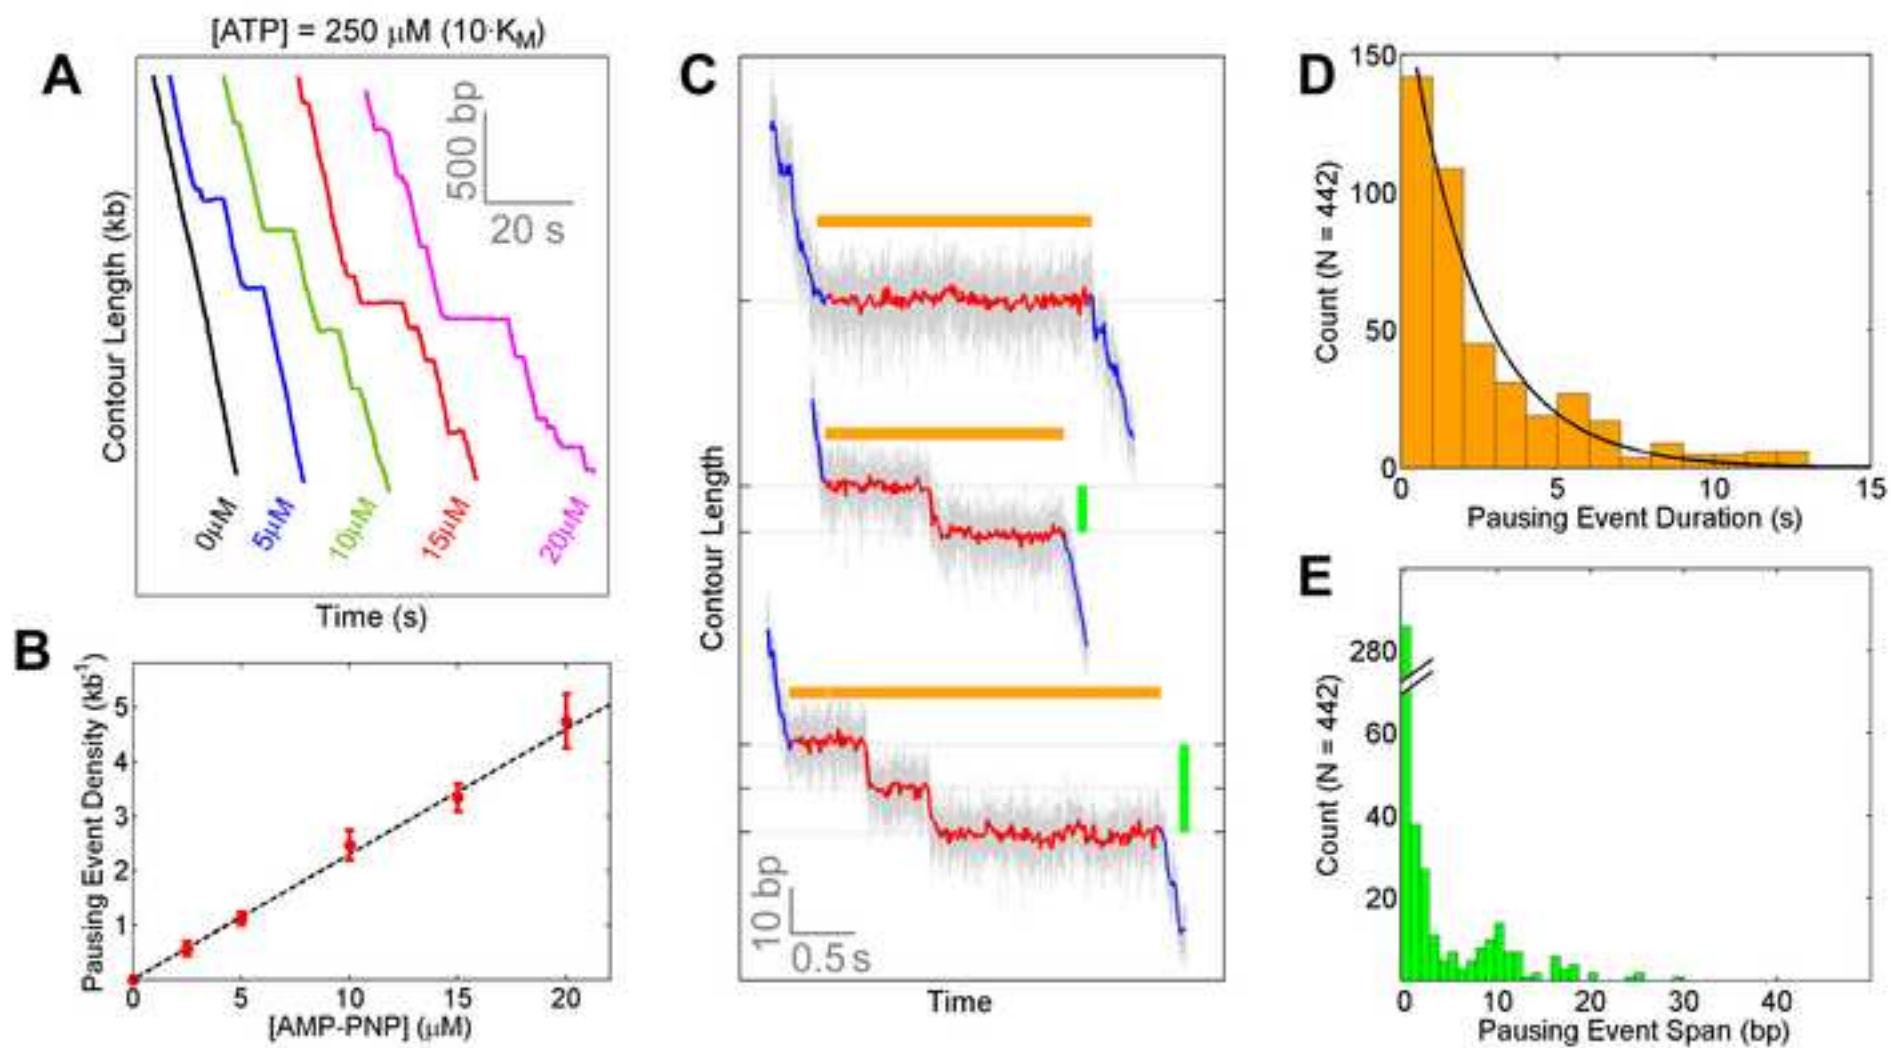

Supplement: NIHMS418647-supplement-02.pdf [file NIHMS418647-supplement-02.pdf]
